# Supplementary material for: Multiplexed bovine milk oligosaccharide analysis with aminoxy tandem mass tags
Source: PLoS One. 2018 Apr 26;13(4):e0196513. doi: 10.1371/journal.pone.0196513 (PMC5919578; doi:10.1371/journal.pone.0196513)
Supplement: S2 Table — (XLSX) [file pone.0196513.s004.xlsx]

## Sheet: S2 Table
S2 Table: Analysis of a bovine milk oligosaccharide extract labeled in a 2:1 molar ratio with TMT6-130 and TMT6-131 reagents -- injection #1.
					Total Reporter Ion Intensity						Ratio (TMT Ion/Control)						Log2 (TMT Ion/Control)
Glycan ID	Avg. RT	Adduct	Mass	GSC	126.13	127.13	128.13	129.14	130.14	131.14	126.13	127.13	128.13	129.14	130.14	131.14	126.13	127.13	128.13	129.14	130.14	131.14
2_0_0_1_0 (3'-SL)	23.790894737	[M + H]	633.211628077	76	1473.903755031	513.200967837	3093.948584901	11301.392608263	949065.447337994	537222.792901611	0.001553005	5.40743E-4	0.003259995	0.011907917	1.0	0.566055	-9.330721448	-10.852767972	-8.260914546	-6.391935115	0.0	-0.820987063
2_0_0_1_0 (6'-SL)	13.89	[M + H]	633.211628077	2	86.290231209	27.674737864	131.201597847	392.222433533	18483.501102875	11300.081420898	0.0046685	0.001497267	0.007098309	0.021220137	1.0	0.61136	-7.742825096	-9.383452688	-7.138308954	-5.55842219	0.0	-0.709904887
2_0_0_2_0	22.9662	[M + H]	924.307044605	5	35.211538315	0.0	53.155467674	89.281492035	16469.85848983	9252.126373291	0.002137938	0.0	0.003227439	0.005420902	1.0	0.561761	-8.869564187	-10.0	-8.275394346	-7.527251307	0.0	-0.831971283
2_1_0_0_0	12.468810811	[M + H]	545.195584082	37	7036.099693718	1233.793599692	2056.298902878	7396.473697565	335342.308097458	219483.488903809	0.020981843	0.003679207	0.00613194	0.022056488	1.0	0.654506	-5.574714776	-8.086389633	-7.349440711	-5.502653077	0.0	-0.611522097
3_2_0_0_0	15.985361702	[M + H]	910.327780047	47	5245.960282631	300.261684095	614.646228088	2246.037832077	134883.500773033	80291.719702148	0.038892528	0.002226082	0.004556867	0.016651687	1.0	0.595267	-4.68436319	-8.811277784	-7.777741893	-5.908187847	0.0	-0.748390767
3_6_1_0_0	18.856166667	[M + H]	1868.703178988	12	1460.057927151	225.530805324	179.594680866	601.633361238	26743.457634392	13955.5365448	0.054594957	0.008433121	0.006715462	0.022496469	1.0	0.52183	-4.195088488	-6.889717687	-7.21829757	-5.474157624	0.0	-0.93834841
4_1_0_0_0	18.245424528	[M + H]	869.301230945	106	8939.445447927	1479.611353361	2547.47015923	15394.784391964	896550.490099581	520304.133381653	0.009970934	0.001650338	0.002841413	0.017171129	1.0	0.58034	-6.648055684	-9.243022746	-8.459175775	-5.863871265	0.0	-0.785029664
4_1_0_1_0	27.810913043	[M + H]	1160.396647473	23	508.206462379	332.619231513	327.394245072	315.728909746	39142.374667641	24679.862532043	0.012983537	0.008497676	0.00836419	0.008066166	1.0	0.630515	-6.267172752	-6.878715888	-6.901558511	-6.953901106	0.0	-0.665396925
4_2_0_0_0 (LNH)	21.029626506	[M + H]	1072.380603478	83	3220.791088386	1089.301921762	1043.295441789	3233.337747829	207854.86303392	117426.61190033	0.015495385	0.005240685	0.005019346	0.015555747	1.0	0.564945	-6.012017606	-7.576028811	-7.638284932	-6.006408476	0.0	-0.823817105
4_4_1_0_0	16.715	[M + H]	1624.597257354	1	93.981517696	14.310365028	24.997083851	43.203134644	2815.604297928	2029.095458984	0.033378809	0.00508252	0.008878053	0.015344178	1.0	0.720661	-4.904923717	-7.62024031	-6.815540983	-6.026164791	0.0	-0.472607855
4_5_1_0_0	18.747	[M + H]	1827.676629887	3	281.841934204	0.0	0.0	0.0	7746.488620117	3847.667214966	0.036383186	0.0	0.0	0.0	1.0	0.496698	-4.780584318	-10.0	-10.0	-10.0	0.0	-1.009558478
5_2_0_0_0	17.412625	[M + H]	1234.43342691	8	179.889741096	65.644625184	100.588209618	204.967390905	17272.992116966	9665.329425049	0.01041451	0.00380042	0.005823439	0.011866351	1.0	0.559563	-6.585261292	-8.039625409	-7.423912995	-6.396979802	0.0	-0.837627206
5_4_0_0_0	14.533142857	[M + H]	1640.592171976	21	5799.256316462	315.240800381	620.008090487	1921.115218895	148097.746928234	78855.970178986	0.039158302	0.0021286	0.004186479	0.012971941	1.0	0.532459	-4.674537978	-8.875879708	-7.900046936	-6.268461835	0.0	-0.909257802
5_4_1_0_0	17.0356	[M + H]	1786.650080785	5	1352.805163307	85.942191851	66.538626757	769.2080005	21712.403448908	12142.989242554	0.062305639	0.003958207	0.003064545	0.035427124	1.0	0.559265	-4.004493457	-7.980937146	-8.350111626	-4.819001855	0.0	-0.83839582
3_3_1_0_0	15.6775	[M + H]	1259.465061389	4	143.33386198	19.582730061	52.314853378	170.939631454	8871.403430904	5501.934596252	0.016156842	0.002207399	0.005897021	0.019268612	1.0	0.620188	-5.951710968	-8.823436635	-7.405797924	-5.697603531	0.0	-0.689223363
Oligosaccharides are represented by their monosaccharide compositions, denoted as Hex_HexNAc_Fuc_NeuAc_NeuGc
3’-SL, 3’-sialyllactose; 6’-SL, 6’-sialyllactose; LNH, lacto-N-hexaose
