# Supplementary material for: Multiplexed bovine milk oligosaccharide analysis with aminoxy tandem mass tags
Source: PLoS One. 2018 Apr 26;13(4):e0196513. doi: 10.1371/journal.pone.0196513 (PMC5919578; doi:10.1371/journal.pone.0196513)
Supplement: S6 Table — (XLSX) [file pone.0196513.s008.xlsx]

## Sheet: S6 Table
S6 Table: Analysis of fucosylated oligosaccharide abundance in mid-lactation milk collected from Holstein (N=10) and Jersey (N=10) dairy cows.
	Relative reporter ion abundance
Glycan ID	Internal standard	Holstein-1	Holstein-2	Holstein-3	Holstein-4	Holstein-5	Holstein-6	Holstein-7	Holstein-8	Holstein-9	Holstein-10	Jersey-1	Jersey-2	Jersey-3	Jersey-4	Jersey-5	Jersey-6	Jersey-7	Jersey-8	Jersey-9	Jersey-10
3_6_1_0_0	1	0.447138	0.635267	0.475921	0.867396	0.498978	0.651045	0.311952	0.635962	0.566946	0.979674	1.79646	0.760221	0.71168	0.844871	1.08754	3.16635	1.83286	1.01591	0.805417	2.23762
4_4_1_0_0	1	0.858196	0.66558	0.678145	0.360931	0.726586	0.301054	0.755426	0.779044	2.14851	1.42929	1.33669	1.22987	0.898551	0.704657	0.592487	1.08881	1.04779	1.26275	0.777962	0.955974
4_5_1_0_0	1	0.289803	0.807999	1.13116	0.621547	0.653485	1.49909	0.4587	0.610557	0.766559	0.898229	1.88736	0.976298	0.604009	1.32311	1.24007	1.02425	1.42029	1.40479	1.27112	1.42754
5_4_1_0_0	1	0.491608	0.767991	0.792146	0.853801	0.940256	1.10627	0.464622	0.882486	1.13993	1.29798	2.20695	0.913586	1.04079	1.15229	1.0244	2.04817	1.39851	0.75043	0.713769	2.14345
Oligosaccharides are represented by their monosaccharide compositions, denoted as Hex_HexNAc_Fuc_NeuAc_NeuGc
